# Supplementary material
Source: PubMed Central journal article supplement (PMC3843493)

## Supporting Information

### Homotropic Cooperativity of Human Liver Microsomal Cytochrome P450 3A Enzymes in Thalidomide 5-Hydroxylation and Formation of a Glutathione Conjugate

Goutam Chowdhury, Norie Murayama, Yusuke Okada, Yasuhiro Uno, Makiko Shimizu, Norio Shibata, F. Peter Guengerich, and Hiroshi Yamazaki

*Chem. Res. Toxicol.* 23, 000-000 (2010)

#### Contents

**Figure S1.** ESI-LC-MS/MS chromatogram and mass spectrum of 5-hydroxythalidomide.

**Figure S2.** ESI-LC-HRMS chromatogram and mass spectrum of the 5-hydroxythalidomide-GSH conjugate.

**Figure S3.** ESI-LC-MS<sup>n</sup> spectrum of the 5-hydroxythalidomide-GSH conjugate.

**Scheme S1.** Proposed mechanism of formation of a GSH conjugate of 5-hydroxythalidomide.

**Figure S1.** ESI-LC-MS/MS chromatogram and mass spectrum of 5-hydroxythalidomide. A) ESI-LC-MS/MS chromatogram of 5-hydroxythalidomide ( $m/z$  273). B) CID spectrum of the  $t_R$  4.31 min peak in part A.

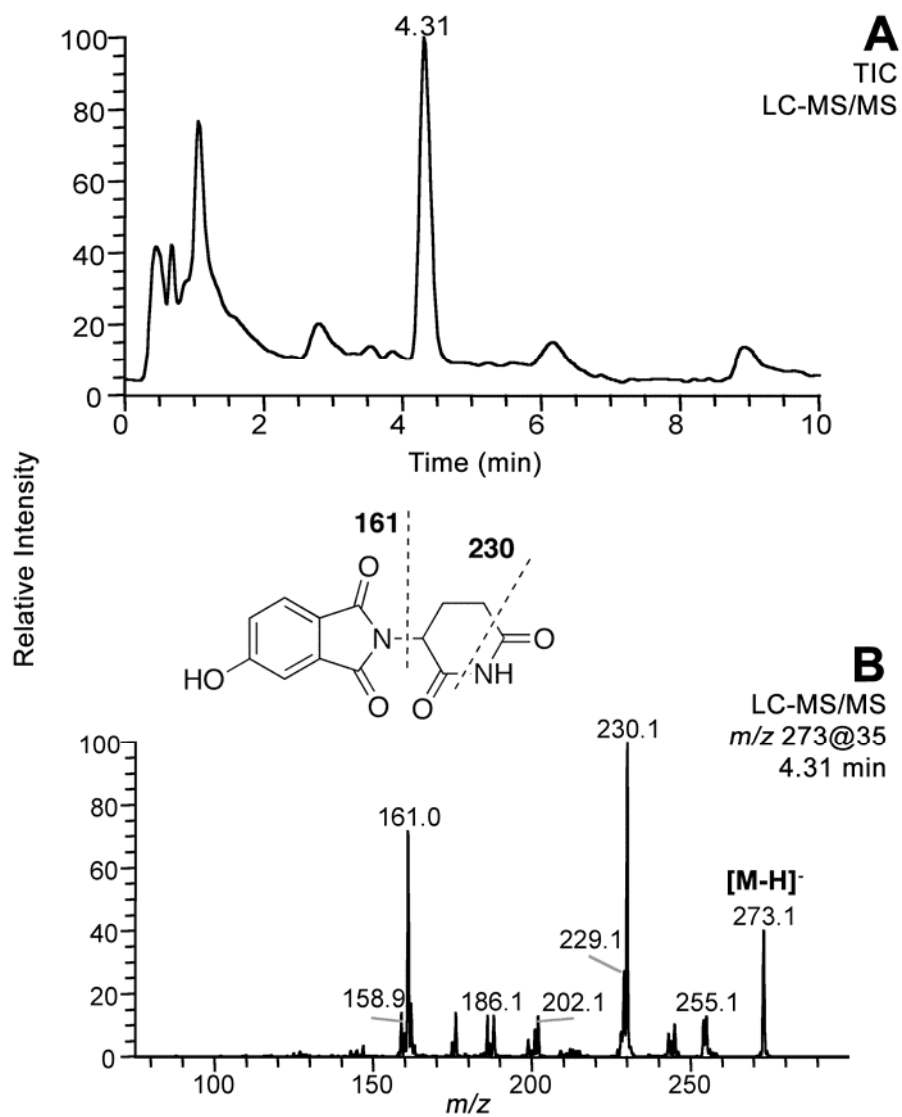

**Figure S2.** ESI-LC-HRMS chromatogram and mass spectrum of the 5-hydroxythalidomide-GSH conjugate. A) Extracted ion chromatogram of the 5-hydroxythalidomide-GSH conjugate,  $m/z$  580. B) HR-MS spectrum of the  $t_R$  3.42 min peak in part A.

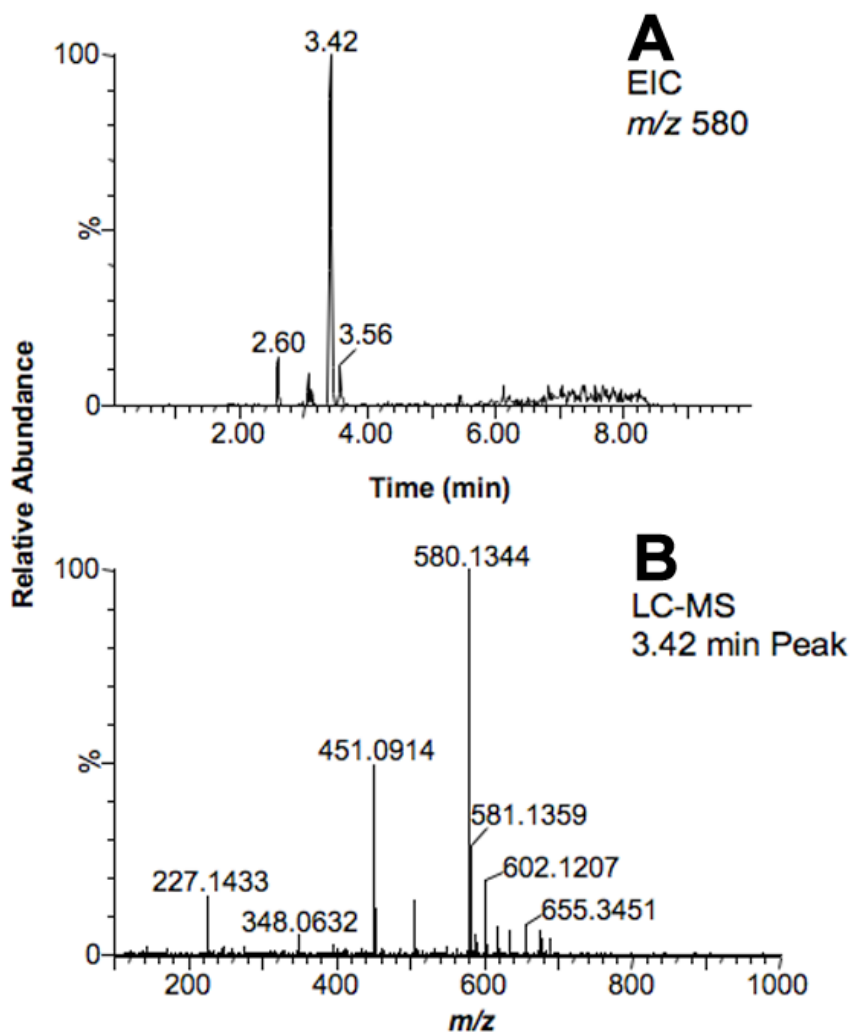

**Figure S3.** ESI-LC-MS<sup>n</sup> spectrum of the 5-hydroxythalidomide-GSH conjugate. A) MS<sup>3</sup> spectra of ions  $m/z$  580@35, 451@35 B) MS<sup>4</sup> spectra of ions  $m/z$  580@35, 451@25, 434@40 C) MS<sup>5</sup> spectra of ions  $m/z$  580@35, 451@25, 434@45, 323@35 D) MS<sup>5</sup> spectra of ions  $m/z$  580@35, 451@25, 434@45, 307@35

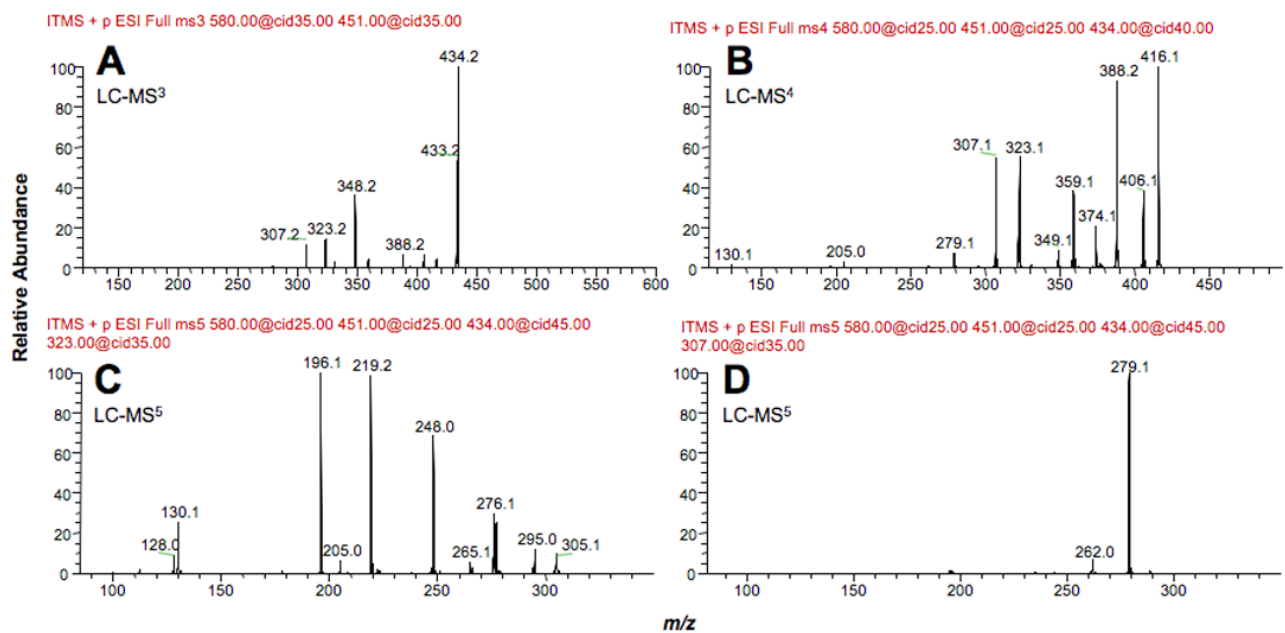

**Scheme S1.** Proposed mechanism for formation of a GSH conjugate of 5-hydroxythalidomide

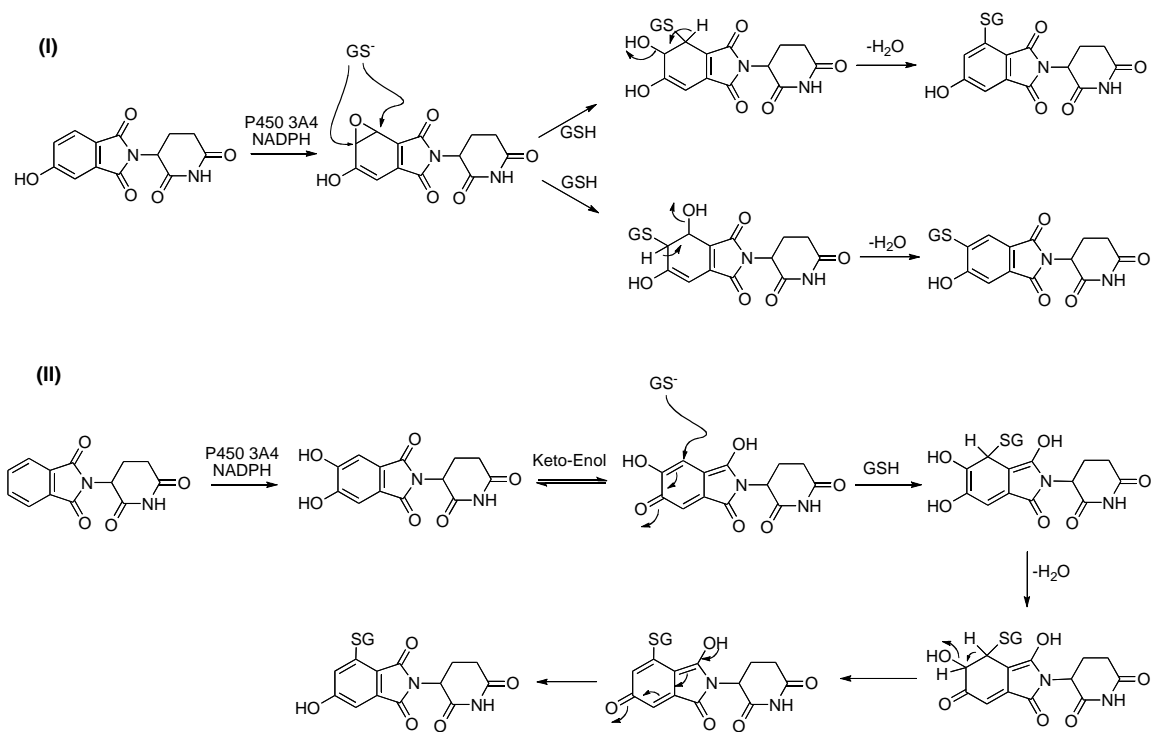

Supplement: NIHMS531013-supplement-1.pdf [file NIHMS531013-supplement-1.pdf]
